# Supplementary material for: Integrated Clinical and Genomic Assessment of Small Cell Bladder Carcinoma Using Population-Based and Mutational Data
Source: Research Square preprint supplement (doi:10.21203/rs.3.rs-7129824/v1), 2025-07-31
Supplement: Supplementary file 1 [file Table 1.pdf › Figure and table/Table 1.pdf]

| Characteristics       | Pre-PSM     |               |               |         | Post-PSM    |              |              |         |
|-----------------------|-------------|---------------|---------------|---------|-------------|--------------|--------------|---------|
|                       | SCCB n(%)   | TCC n(%)      | Overalln(%)   | P value | SCCB n(%)   | TCC n(%)     | Overall n(%) | P value |
|                       | (N=434)     | (N=16093)     | (N=16527)     |         | (N=433)     | (N=1719)     | (N=2152)     |         |
| <b>Age,years</b>      |             |               |               | 0.6735  |             |              |              | 0.9987  |
| <50                   | 12 (2.8%)   | 564 (3.5%)    | 576 (3.5%)    |         | 12 (2.8%)   | 50 (2.9%)    | 62 (2.9%)    |         |
| 50-59                 | 49 (11.3%)  | 2136 (13.3%)  | 2185 (13.2%)  |         | 49 (11.3%)  | 195 (11.3%)  | 244 (11.3%)  |         |
| 60-69                 | 123 (28.3%) | 4355 (27.1%)  | 4478 (27.1%)  |         | 123 (28.4%) | 497 (28.9%)  | 620 (28.8%)  |         |
| 70-79                 | 131 (30.2%) | 4762 (29.6%)  | 4893 (29.6%)  |         | 130 (30.0%) | 505 (29.4%)  | 635 (29.5%)  |         |
| ≥80                   | 119 (27.4%) | 4276 (26.6%)  | 4395 (26.6%)  |         | 119 (27.5%) | 472 (27.5%)  | 591 (27.5%)  |         |
| <b>Sex</b>            |             |               |               | 0.4942  |             |              |              | 0.9739  |
| Female                | 107 (24.7%) | 4222 (26.2%)  | 4329 (26.2%)  |         | 107 (24.7%) | 421 (24.5%)  | 528 (24.5%)  |         |
| Male                  | 327 (75.3%) | 11871 (73.8%) | 12198 (73.8%) |         | 326 (75.3%) | 1298 (75.5%) | 1624 (75.5%) |         |
| <b>Race</b>           |             |               |               | 0.7418  |             |              |              | 0.3186  |
| Black                 | 26 (6.0%)   | 1084 (6.7%)   | 1110 (6.7%)   |         | 26 (6.0%)   | 78 (4.5%)    | 104 (4.8%)   |         |
| White                 | 386 (88.9%) | 14116 (87.7%) | 14502 (87.7%) |         | 385 (88.9%) | 1568 (91.2%) | 1953 (90.8%) |         |
| Other                 | 22 (5.1%)   | 893 (5.5%)    | 915 (5.5%)    |         | 22 (5.1%)   | 73 (4.2%)    | 95 (4.4%)    |         |
| <b>Marital status</b> |             |               |               | 0.4606  |             |              |              | 0.8474  |
| Yes                   | 259 (59.7%) | 9904 (61.5%)  | 10163 (61.5%) |         | 259 (59.8%) | 1017 (59.2%) | 1276 (59.3%) |         |
| No                    | 175 (40.3%) | 6189 (38.5%)  | 6364 (38.5%)  |         | 174 (40.2%) | 702 (40.8%)  | 876 (40.7%)  |         |
| <b>Stage</b>          |             |               |               | < 0.001 |             |              |              | 0.3109  |
| I                     | 44 (10.1%)  | 5863 (36.4%)  | 5907 (35.7%)  |         | 44 (10.2%)  | 125 (7.2%)   | 169 (7.9%)   |         |
| II                    | 173 (39.9%) | 4659 (29.0%)  | 4832 (29.2%)  |         | 173 (40.0%) | 749 (43.6%)  | 922 (42.8%)  |         |
| III                   | 65 (15.0%)  | 2392 (14.9%)  | 2457 (14.9%)  |         | 65 (15.0%)  | 285 (16.6%)  | 350 (16.3%)  |         |
| IV                    | 152 (35.0%) | 3179 (19.8%)  | 3331 (20.2%)  |         | 151 (34.9%) | 560 (32.6%)  | 711 (33.0%)  |         |
| <b>T</b>              |             |               |               | < 0.001 |             |              |              | 0.4532  |
| T1                    | 65 (15.0%)  | 6039 (37.5%)  | 6104 (36.9)   |         | 64 (14.8%)  | 191 (11.1%)  | 255 (11.8%)  |         |

|                      |             |               |               |         |             |              |              |        |
|----------------------|-------------|---------------|---------------|---------|-------------|--------------|--------------|--------|
| T2                   | 232 (53.5%) | 5611 (34.9%)  | 5843 (35.4%)  |         | 232 (53.6%) | 974 (56.7%)  | 1206 (56.0%) |        |
| T3                   | 87 (20.0%)  | 2927 (18.2%)  | 3014 (18.2%)  |         | 87 (20.1%)  | 355 (20.7%)  | 442 (20.5%)  |        |
| T4                   | 50 (11.5%)  | 1516 (9.4%)   | 1566 (9.5%)   |         | 50 (11.5%)  | 199 (11.6%)  | 249 (11.6%)  |        |
| <b>N</b>             |             |               |               | < 0.001 |             |              |              | 0.7584 |
| N0                   | 341 (78.6%) | 13656 (84.9%) | 13997 (84.7%) |         | 340 (78.5%) | 1376 (80.0%) | 1716 (79.7%) |        |
| N1                   | 30 (6.9%)   | 1184 (7.4%)   | 1214 (7.3%)   |         | 30 (6.9%)   | 115 (6.7%)   | 145 (6.7%)   |        |
| N2                   | 63 (14.5%)  | 1198 (7.4%)   | 1261 (7.6%)   |         | 63 (14.5%)  | 228 (13.3%)  | 291 (13.5%)  |        |
| N3                   | 0 (0%)      | 55 (0.3%)     | 55 (0.3%)     |         | 0 (0%)      | 0 (0%)       | 0 (0%)       |        |
| <b>M</b>             |             |               |               | < 0.001 |             |              |              | 0.5246 |
| M0                   | 354 (81.6%) | 14962 (93.0%) | 15316 (92.7%) |         | 354 (81.8%) | 1430 (83.2%) | 1784 (82.9%) |        |
| M1                   | 80 (18.4%)  | 1131 (7.0%)   | 1211 (7.3%)   |         | 79 (18.2%)  | 289 (16.8%)  | 368 (17.1%)  |        |
| <b>Surgery</b>       |             |               |               | 0.4337  |             |              |              | 0.4787 |
| No                   | 11 (2.5%)   | 382 (2.4%)    | 393 (2.4%)    |         | 11 (2.5%)   | 42 (2.4%)    | 53 (2.5%)    |        |
| Cystectomy           | 135 (31.1%) | 5623 (34.9%)  | 5758 (34.8%)  |         | 135 (31.2%) | 605 (35.2%)  | 740 (34.4%)  |        |
| TURB                 | 229 (52.8%) | 8017 (49.8%)  | 8246 (49.9%)  |         | 229 (52.9%) | 857 (49.9%)  | 1086 (50.5%) |        |
| Other                | 59 (13.6%)  | 2071 (12.9%)  | 2130 (12.9%)  |         | 58 (13.4%)  | 215 (12.5%)  | 273 (12.7%)  |        |
| <b>Radiation</b>     |             |               |               | < 0.001 |             |              |              | 0.3118 |
| Yes                  | 136 (31.3%) | 1802 (11.2%)  | 1938 (11.7%)  |         | 135 (31.2%) | 491 (28.6%)  | 626 (29.1%)  |        |
| None/Unknown         | 298 (68.7%) | 14291 (88.8%) | 14589 (88.3%) |         | 298 (68.8%) | 1228 (71.4%) | 1526 (70.9%) |        |
| <b>Chemotherapy</b>  |             |               |               | < 0.001 |             |              |              | 0.9921 |
| Yes                  | 304 (70.0%) | 5903 (36.7%)  | 6207 (37.6%)  |         | 303 (70.0%) | 1200 (69.8%) | 1503 (69.8%) |        |
| No/Unknown           | 130 (30.0%) | 10190 (63.3%) | 10320 (62.4%) |         | 130 (30.0%) | 519 (30.2%)  | 649 (30.2%)  |        |
| <b>Tumor size,mm</b> |             |               |               | < 0.001 |             |              |              | 0.7183 |
| ≤30                  | 143 (32.9%) | 6929 (43.1%)  | 7072 (42.8%)  |         | 143 (33.0%) | 562 (32.7%)  | 705 (32.8%)  |        |
| 31-51                | 172 (39.6%) | 5675 (35.3%)  | 5847 (35.4%)  |         | 172 (39.7%) | 656 (38.2%)  | 828 (38.5%)  |        |
| ≥52                  | 119 (27.4%) | 3489 (21.7%)  | 3608 (21.8%)  |         | 118 (27.3%) | 501 (29.1%)  | 619 (28.8%)  |        |
