# Supplementary material for: Integrated Clinical and Genomic Assessment of Small Cell Bladder Carcinoma Using Population-Based and Mutational Data
Source: Research Square preprint supplement (doi:10.21203/rs.3.rs-7129824/v1), 2025-07-31

**Declaration of Interest Statement**

☑ The authors declare that they have no known competing financial interests or personal relationships that could have appeared to influence the work reported in this paper.

The author is an Editorial Board Member/Editor-in-Chief/Associate Editor/Guest Editor for this journal and was not involved in the editorial review or the decision to publish this article.

The authors declare the following financial interests/personal relationships which may be considered as potential competing interests:


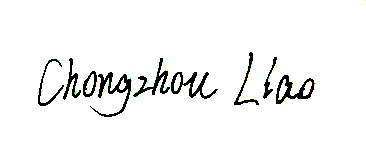

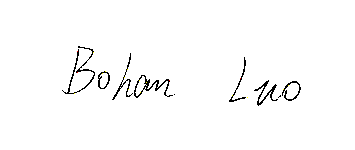

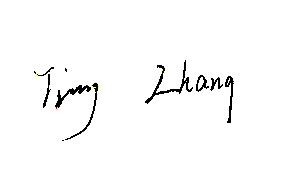

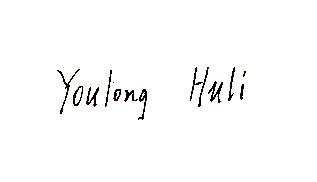


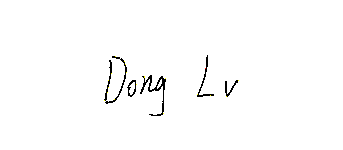

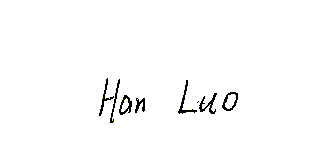

Supplement: Supplementary file 2 [file Declaration of Interest Statement.docx]
