# Supplementary material for: Integrated Clinical and Genomic Assessment of Small Cell Bladder Carcinoma Using Population-Based and Mutational Data
Source: Research Square preprint supplement (doi:10.21203/rs.3.rs-7129824/v1), 2025-07-31
Supplement: Supplementary file 2 [file Table 2.pdf › Figure and table/Table 2.pdf]

| Characteristics       | Univariate analysis |         | Multivariate analysis |         |
|-----------------------|---------------------|---------|-----------------------|---------|
|                       | HR (95%CI)          | P value | HR (95%CI)            | P value |
| <b>Age,years</b>      |                     |         |                       |         |
| <50                   | Reference           |         | Reference             |         |
| 50-59                 | 2.060 (0.998-4.250) | 0.100   | 1.484 (0.694-3.175)   | 0.393   |
| 60-69                 | 1.784 (0.891-3.572) | 0.170   | 1.211 (0.588-2.492)   | 0.663   |
| 70-79                 | 2.434 (1.220-4.856) | 0.034   | 1.763 (0.858-3.622)   | 0.195   |
| ≥80                   | 3.773 (1.890-7.532) | 0.002   | 2.387 (1.162-4.904)   | 0.047   |
| <b>Sex</b>            |                     |         |                       |         |
| Female                | Reference           |         |                       |         |
| Male                  | 1.066 (0.866-1.312) | 0.611   |                       |         |
| <b>Race</b>           |                     |         |                       |         |
| Black                 | Reference           |         | Reference             |         |
| White                 | 0.707(0.495-1.009)  | 0.109   | 1.097 (0.747-1.609)   | 0.694   |
| Other                 | 0.400 (0.220-0.699) | 0.007   | 0.483 (0.265-0.880)   | 0.046   |
| <b>Marital status</b> |                     |         |                       |         |
| No                    | Reference           |         | Reference             |         |
| Yes                   | 0.667 (0.557-0.798) | <0.001  | 0.782 (0.645-0.947)   | 0.035   |
| <b>Stage</b>          |                     |         |                       |         |
| I                     | Reference           |         | Reference             |         |
| II                    | 1.601 (1.050-2.442) | 0.055   | 1.462 (0.811-2.636)   | 0.289   |
| III                   | 1.821 (1.129-2.937) | 0.024   | 1.287 (0.680-2.436)   | 0.515   |
| IV                    | 2.985 (1.957-4.553) | <0.001  | 1.250 (0.628-2.486)   | 0.594   |
| <b>T</b>              |                     |         |                       |         |
| T1                    | Reference           |         | Reference             |         |
| T2                    | 1.294 (0.983-1.702) | 0.122   | 1.199 (0.742-1.937)   | 0.533   |
| T3                    | 1.512 (1.107-2.067) | 0.029   | 1.909 (1.117-3.262)   | 0.047   |
| T4                    | 2.173 (1.530-3.086) | <0.001  | 2.093 (1.244-3.522)   | 0.020   |
| <b>N</b>              |                     |         |                       |         |
| N0                    | Reference           |         | Reference             |         |
| N1                    | 1.414 (1.001-1.996) | 0.099   | 1.793 (1.010-2.923)   | 0.049   |
| N2                    | 1.700 (1.342-2.153) | <0.001  | 1.647 (1.137-2.387)   | 0.027   |
| <b>M</b>              |                     |         |                       |         |
| M0                    | Reference           |         | Reference             |         |
| M1                    | 2.513 (2.019-3.127) | <0.001  | 3.198 (2.164-4.725)   | <0.001  |
| <b>Surgery</b>        |                     |         |                       |         |
| Cystectomy            | Reference           |         | Reference             |         |
| No                    | 1.794 (1.039-3.097) | 0.078   | 2.204 (1.235-3.934)   | 0.025   |
| TURB                  | 1.417 (1.156-1.737) | 0.005   | 1.583 (1.234-2.032)   | 0.002   |
| Other                 | 1.157 (0.859-1.558) | 0.421   | 1.166 (0.840-1.618)   | 0.442   |
| <b>Radiation</b>      |                     |         |                       |         |
| None/Unknown          | Reference           |         | Reference             |         |
| Yes                   | 0.899 (0.743-1.088) | 0.359   |                       |         |
| <b>Chemotherapy</b>   |                     |         |                       |         |

|                      |                     |        |                     |        |
|----------------------|---------------------|--------|---------------------|--------|
| No/Unknown           | Reference           |        | Reference           |        |
| Yes                  | 0.563 (0.466-0.681) | <0.001 | 0.480 (0.388-0.595) | <0.001 |
| <b>Tumor size,mm</b> |                     |        |                     |        |
| ≤30                  | Reference           |        | Reference           |        |
| 31-51                | 1.054 (0.853-1.304) | 0.682  | 0.843 (0.675-1.054) | 0.208  |
| ≥52                  | 1.321 (1.054-1.657) | 0.043  | 0.889 (0.699-1.130) | 0.420  |
