# Supplementary material for: Integrated Clinical and Genomic Assessment of Small Cell Bladder Carcinoma Using Population-Based and Mutational Data
Source: Research Square preprint supplement (doi:10.21203/rs.3.rs-7129824/v1), 2025-07-31
Supplement: Supplementary file 3 [file Table 3.pdf › Figure and table/Table 3.pdf]

| Characteristics       | Univariate analysis |         | Multivariate analysis |         |
|-----------------------|---------------------|---------|-----------------------|---------|
|                       | HR (95%CI)          | P value | HR (95%CI)            | P value |
| <b>Age,years</b>      |                     |         |                       |         |
| <50                   | Reference           |         | Reference             |         |
| 50-59                 | 1.656 (0.795-3.449) | 0.259   | 0.959 (0.445-2.065)   | 0.928   |
| 60-69                 | 1.442 (0.717-2.898) | 0.388   | 0.758 (0.364-1.576)   | 0.533   |
| 70-79                 | 1.753 (0.874-3.517) | 0.185   | 0.990 (0.480-2.045)   | 0.983   |
| ≥80                   | 2.437 (1.212-4.899) | 0.036   | 1.183 (0.567-2.470)   | 0.707   |
| <b>Sex</b>            |                     |         |                       |         |
| Female                | Reference           |         |                       |         |
| Male                  | 0.995 (0.790-1.253) | 0.971   |                       |         |
| <b>Race</b>           |                     |         |                       |         |
| Black                 | Reference           |         | Reference             |         |
| White                 | 0.661 (0.451-0.970) | 0.076   | 0.995 (0.655-1.512)   | 0.985   |
| Other                 | 0.286 (0.144-0.570) | 0.003   | 0.334 (0.161-0.696)   | 0.014   |
| <b>Marital status</b> |                     |         |                       |         |
| No                    | Reference           |         | Reference             |         |
| Yes                   | 0.734 (0.599-0.900) | 0.012   | 0.890 (0.715-1.109)   | 0.384   |
| <b>Stage</b>          |                     |         |                       |         |
| I                     | Reference           |         | Reference             |         |
| II                    | 1.647 (1.065-2.547) | 0.060   | 1.713 (0.886-3.311)   | 0.179   |
| III                   | 2.178 (1.350-3.516) | 0.007   | 2.261 (1.104-4.632)   | 0.061   |
| IV                    | 3.716 (2.421-5.703) | <0.001  | 1.875 (0.884-3.979)   | 0.169   |
| <b>T</b>              |                     |         |                       |         |
| T1                    | Reference           |         | Reference             |         |
| T2                    | 1.331 (0.968-1.831) | 0.140   | 1.175 (0.715-1.933)   | 0.593   |
| T3                    | 1.590 (1.110-2.278) | 0.034   | 1.611 (0.910-2.853)   | 0.170   |
| T4                    | 2.519 (1.703-3.725) | <0.001  | 2.001 (1.161-3.451)   | 0.036   |
| <b>N</b>              |                     |         |                       |         |
| N0                    | Reference           |         | Reference             |         |
| N1                    | 1.708 (1.188-2.456) | 0.015   | 2.121 (1.279-3.517)   | 0.015   |
| N2                    | 1.812 (1.398-2.347) | <0.001  | 1.612 (1.095-2.37)    | 0.042   |
| <b>M</b>              |                     |         |                       |         |
| M0                    | Reference           |         | Reference             |         |
| M1                    | 2.901 (2.298-3.662) | <0.001  | 3.272 (2.196-4.875)   | <0.001  |
| <b>Surgery</b>        |                     |         |                       |         |
| Cystectomy            | Reference           |         | Reference             |         |
| No                    | 2.183 (1.221-3.902) | 0.027   | 3.044 (1.631-5.681)   | 0.003   |
| TURB                  | 1.501 (1.190-1.894) | 0.004   | 1.822 (1.367-2.428)   | <0.001  |
| Other                 | 1.187 (0.845-1.668) | 0.408   | 1.380 (0.948-2.008)   | 0.158   |
| <b>Radiation</b>      |                     |         |                       |         |
| None/Unknown          | Reference           |         |                       |         |
| Yes                   | 0.813 (0.653-1.013) | 0.121   |                       |         |
| <b>Chemotherapy</b>   |                     |         |                       |         |

|                      |                     |        |                     |        |
|----------------------|---------------------|--------|---------------------|--------|
| No/Unknown           | Reference           |        | Reference           |        |
| Yes                  | 0.542 (0.438-0.671) | <0.001 | 0.389 (0.304-0.499) | <0.001 |
| <b>Tumor size,mm</b> |                     |        |                     |        |
| ≤30                  | Reference           |        | Reference           |        |
| 31-51                | 1.201 (0.941-1.532) | 0.217  | 0.945 (0.732-1.219) | 0.715  |
| ≥52                  | 1.476 (1.138-1.913) | 0.014  | 0.948 (0.720-1.248) | 0.748  |
