# Supplementary material for: Integrated Clinical and Genomic Assessment of Small Cell Bladder Carcinoma Using Population-Based and Mutational Data
Source: Research Square preprint supplement (doi:10.21203/rs.3.rs-7129824/v1), 2025-07-31
Supplement: Supplementary file 4 [file Tittle Page.doc]

**Integrated Clinical and Genomic Assessment of Small Cell Bladder Carcinoma Using Population-Based and Mutational Data**

Chongzhou Liao1, Bohan Luo2, Ting Zhang3, Youlong Huili1, Dong Lv1*, Han Luo4*

1. Department of Urology, Deyang People's Hospital, Deyang, China
2. Department of Organ Transplantation, Sichuan Academy of Medical Sciences and Sichuan Provincial People’s Hospital, University of Electronic Science and Technology of China, Chengdu, China
3. Department of Hospital Infection Management, Deyang People's Hospital, Deyang, 618000, China
4. Department of Hepatobiliary Surgery, Zigong Fourth People’s Hospital, Zigong, China

* Co-Correspondence: Dong Lv, Email: lv-0919@163.com, Han Luo, Email: [95316621@qq.com](mailto:95316621@qq.com). Address: No. 19, Tanmulin Street, Ziliujing District, Zigong City, Sichuan Province, China Tel: +86 18509513494
